# Supplementary material
Source: Copernicus journal article supplement (doi:10.5194/egusphere-2026-1481)
Supplement: Supplementary file [file egusphere-2026-1481-RC1-supplement.pdf]

## Reviewer report, egusphere-2026-1481

*Ojha, Kjellsson, Martin, Chafik, Maisonnave & Park, "Meridional heat transport in the North Atlantic: Effects of ocean and atmosphere grid resolutions in FOCI-OpenIFS-AGRIF 3.0", submitted to Geoscientific Model Development. Line numbers refer to the PDF margin numbering.*

**Recommendation: publication after moderate revisions.** This is a useful model-description-and-application paper within the scope of GMD. The direct nest-to-atmosphere coupling is a genuine technical contribution, the three-member design (LL, LH, HH) isolates the ocean- and atmosphere-resolution effects cleanly, and the central result, that increasing ocean resolution alone shifts meridional heat transport from the atmosphere to the ocean while a matching atmospheric resolution is needed for a realistic subpolar balance, is novel and well motivated. The science is not in question; the required work is in the figures, a number of citation attributions, and the language. On the citations specifically, several cited claims are only partially supported by the work they cite and two are miscited; these are listed under Citation fixes.

### Major points

**M1.** Figure 5 must be regenerated: the Mediterranean is absent from the 800 m maps and sub-seafloor points appear plotted at about -2 degC, and the caption mislabels the cross-sections "(d-h)" where it should read "(e-h)".

**M2.** Replot Figure 8 on latitude and longitude instead of model grid indices, so the Gulf Stream separation latitude and NAC path it is meant to demonstrate can actually be located.

**M3.** Figure 4 has four panels but shows only two differences, LH-LL in (a) and (c) and HH-LH in (b) and (d), with no HH-LL panel; yet the caption lists "LL, LH, and HH respectively" and the text at L226-L227 compares "HH-LL" against LH-LL, which is not plotted. Fix it either by (i) adding the HH-LL panels, or (ii) rewording the text to compare HH-LH with LH-LL and renaming the caption "(a, c) LH-LL and (b, d) HH-LH".

**M4.** State clearly that the constant-1950 runs cannot exhibit a forced trend; relabel the Figure 6d axis as model years rather than 1950-2040, and present the lower-climate-sensitivity inference (L491-L495) as an untested hypothesis.

**M5.** Two citations are simply wrong, the "eddy killing" effect (L108) and the SST/heat-flux result (L463-L465); see Citation fixes for the correct references.

**M6.** Three further attributions are over-broad and should be softened or re-cited (Sidorenko 2015, Gent and McWilliams 1990, Meccia 2023); the reasons are under Citation fixes.

**M7.** Add the missing companion and recent references listed below.

**M8.** The headline result, that higher resolution shifts heat transport from the atmosphere to the ocean, is a Bjerknes-compensation statement: rising ocean heat transport (OHT) is offset by falling atmospheric transport (AHT), leaving the total nearly unchanged. The paper argues this only qualitatively from the hard-to-read Figure 11 sketch. Quantify it with a compensation rate  $C = -dAHT/dOHT$  for each configuration pair and latitude band ( $C$  near 1 is near-complete compensation); this would back the claim that compensation is stronger at mid-latitudes than toward the Arctic. Also expand the Figure 11 caption (arrows, TOA/surface levels, sign convention, integration regions).

**M9.** Show that the model drift over years 51-100 is comparable across LL, LH and HH, to justify interpreting the inter-configuration differences as resolution effects rather than differential drift.

### Citation fixes

- **L108 (miscited).** The "eddy killing" wind-stress feedback is attributed to Zhai et al. (2010), which is about eddy-energy dissipation at western boundaries; the correct reference is Renault et al. (2016, doi:10.1175/JPO-D-16-0115.1).
- **L463-L465 (miscited).** The SST/latent-heat-flux result is attributed to Roberts et al. (2017), an ocean-heat-content budget study; the intended reference is Roberts et al. (2016, doi:10.1002/2016GL070559).
- **L68-L71 (overstated).** Sidorenko et al. (2015) state that AWI-CM performs "at least as well as" leading CMIP5 models, not that it beats their average.
- **L38-L40 (overstated).** That Gent-McWilliams "does not include the kinetic energy transfer accurately" is the authors' framing, not a finding of Gent and McWilliams (1990).
- **L50-L52 (mis-grouped).** Meccia et al. (2023) concerns internal multi-centennial AMOC variability, not the resolution dependence for which it is cited.

- **L19-L21 (partially supported).** The “1.2 PW, 60%” value at 26.5N sits at the upper end of Trenberth and Fasullo (2017), who give about 1.0 PW there; check the value or the latitude.
- **L430-L432 (loose fit).** Roberts et al. (2018) is a model-configuration description and is a weak citation for enhanced poleward heat transport; the other three references in that sentence do support the claim.

## References to add (verified DOIs)

- VIKING20X, the lineage of the eddy-rich nest: Biastoch et al. (2021), doi:10.5194/os-17-1177-2021.
- Companion FOCI-OpenIFS resolution study, to be updated from “in press”: Sieker et al. (2026), doi:10.1007/s00382-026-08110-6.
- OpenIFS-FESOM2 unstructured-mesh alternative AWI-CM3: Streffing et al. (2022), doi:10.5194/gmd-15-6399-2022.
- Mesoscale review for the methodological premise (L35-L41): Hewitt et al. (2020), doi:10.1007/s40641-020-00164-w.
- AMOC framing in the introduction (L17-L19): Buckley and Marshall (2016), doi:10.1002/2015RG000493.
- Mesoscale control of subpolar MHT (L32-L34): Zhao et al. (2018), doi:10.1038/s41467-018-03134-x.
- Scalability of OpenIFS over ECHAM6 (L85-L86): Kjellsson et al. (2020), doi:10.21957/469hc10jk5 (already in the list; cite it at this sentence).

## Figures and tables

- **Table 1.** Columns are ordered HH/LH/LL while the text uses LL/LH/HH; reorder for consistency, and state the global lateral-viscosity scheme and value.
- **Figure 4.** See M3 (four panels, two differences, no HH-LL panel).
- **Figure 6.** See M4 (calendar-labelled axis on constant-1950 runs).
- **Figure 10.** The caption omits “(c)” before turbulent heat flux and the SST units in (a); state the heat-flux sign convention.
- **Figure 11.** See M8 (caption needs defining; printed numbers hard to read).
- **Figure A1.** The panels are labelled February but the caption says March, and the caption calls them “annual mean” while showing monthly means.
- **Figure A2.** The caption repeats “(d-f)”, and panel (b) appears labelled “LM” rather than “LH”; please verify.
- Figures 1, 2, 3, 7 and 9 are clear and need no changes beyond the points above.

## Grammar, wording and typography

77 line-level items (none affect the science).

| Line   | Correction                                                                                                                         |
|--------|------------------------------------------------------------------------------------------------------------------------------------|
| [L1]   | “a new coupled climate model configurations named” -> a new coupled climate model configuration named                              |
| [L21]  | “is an crucial contribution” -> is a crucial contribution                                                                          |
| [L27]  | “as the the residual” -> as the residual                                                                                           |
| [L32]  | “However in situ measurements” -> However, in situ measurements                                                                    |
| [L33]  | “as it can not capture the mesoscale activities realistically” -> as it cannot capture the mesoscale activity realistically        |
| [L38]  | “Non-eddyding ocean models, often use” -> Non-eddyding ocean models often use                                                      |
| [L44]  | “A realisitc representation” -> A realistic representation                                                                         |
| [L51]  | “which further enhance the poleward heat transport” -> which further enhances the poleward heat transport                          |
| [L60]  | “nested models still enable far-field feedbacks” -> nested models still capture far-field feedbacks                                |
| [L87]  | “as it it largely the same” -> as it is largely the same                                                                           |
| [L90]  | “the reader is referred to (Matthes et al., 2020)” -> the reader is referred to Matthes et al. (2020)                              |
| [L99]  | “as function of grid resolution” -> as a function of grid resolution                                                               |
| [L108] | “a drag coefficient which in dependent on atmospheric stability” -> a drag coefficient which is dependent on atmospheric stability |
| [L117] | “Sea-ice dynamics and physics is done” -> Sea-ice dynamics and physics are done                                                    |
| [L133] | “We applied and AGRIF refinement factor of” -> We applied an AGRIF refinement factor of                                            |
| [L145] | “In FOCI verison 1.0” -> In FOCI version 1.0                                                                                       |

| Line   | Correction                                                                                                                                                                                                                                     |
|--------|------------------------------------------------------------------------------------------------------------------------------------------------------------------------------------------------------------------------------------------------|
| [L157] | “rather via file I/O alleviates” -> rather than via file I/O alleviates                                                                                                                                                                        |
| [L167] | “as well as ship-borne instruments” -> (no change needed; flagged for hyphenation consistency with shipborne)                                                                                                                                  |
| [L190] | “A technical comparison can be found in (Kjellsson et al., 2020)” -> A technical comparison can be found in Kjellsson et al. (2020)                                                                                                            |
| [L192] | “listed in Table (1)” -> listed in Table 1                                                                                                                                                                                                     |
| [L198] | “All the experiments have carried out for 100 years” -> All the experiments were carried out for 100 years                                                                                                                                     |
| [L205] | “is discussed in details in the next sections” -> is discussed in detail in the next sections                                                                                                                                                  |
| [L206] | “the higher resolution in both atmosphere and ocean have improved” -> the higher resolution in both atmosphere and ocean has improved                                                                                                          |
| [L218] | “the ocean at mid-depth and 10–45°N cools” -> the ocean at mid-depth and 10–45°N cools                                                                                                                                                         |
| [L239] | “900 s compared to 18000 s in LL” -> 900 s compared to 1800 s in LL                                                                                                                                                                            |
| [L240] | “In consequence, sea ice is thicker” -> Use “As a consequence,” or “Consequently,”                                                                                                                                                             |
| [L246] | “resulting in significant warmer SST” -> resulting in significantly warmer SST                                                                                                                                                                 |
| [L249] | “This ocean dynamics–driven temperature change” -> “ocean-dynamics-driven” or “ocean-circulation-driven” (hyphenation/awkward)                                                                                                                 |
| [L254] | “to explain the cold and fresh difference at mid-depth” -> “the cold and fresh anomaly” or “cold, fresh difference”                                                                                                                            |
| [L259] | “We found no conclusive evidence for this in our simulations however.” -> Move/offset “however”: “We found no conclusive evidence for this in our simulations, however.”                                                                       |
| [L261] | “a prominent warm and saline intermediate–depth water mass of heat and salinity” -> Redundant; delete “of heat and salinity”                                                                                                                   |
| [L267] | “allows for an unrealistically large outflow” -> Acceptable; consider “allows an unrealistically large outflow”                                                                                                                                |
| [L278] | “the maximum of the overturning streamfucntion” -> the maximum of the overturning streamfunction                                                                                                                                               |
| [L284] | “This stronger AMOC result from explicitly resolving” -> This stronger AMOC results from explicitly resolving                                                                                                                                  |
| [L288] | “an observational mean meridional heat transport estimate ... are shown as dashed black line” -> “is shown as a dashed black line” (singular estimate)                                                                                         |
| [L289] | “A stronger AMOC is an enhanced northward volume transport” -> A stronger AMOC implies an enhanced northward volume transport                                                                                                                  |
| [L289] | “meridional heat ransport estimate from the RAPID and OSNAP arrays” -> “heat transport estimate” (Fig. 7 caption)                                                                                                                              |
| [L291] | “into the the subpolar North Atlantic” -> into the subpolar North Atlantic                                                                                                                                                                     |
| [L292] | “into the the subpolar North Atlantic” -> Delete duplicate “the”                                                                                                                                                                               |
| [L295] | “but HH simulating the overall largest transport” -> “with HH simulating” or “but HH simulates”                                                                                                                                                |
| [L296] | “at ~63°N the volume transport of LH and HH is the same” -> “are the same” or “is identical” (two configs)                                                                                                                                     |
| [L299] | “As the changes in ocean circulation primarily results from” -> “primarily result from” (plural subject “changes”)                                                                                                                             |
| [L300] | “From drifter observation, Li et al. (2022) showed” -> “From drifter observations,”                                                                                                                                                            |
| [L305] | “the reduction of the North Atlantic cold bias in LL” -> “in LH” (the bias is in LL; reduction occurs in LH), check intended config                                                                                                            |
| [L305] | “arrows of standard length indicates current direction” -> “arrows of standard length indicate”                                                                                                                                                |
| [L307] | “such as the western boundary currents and NAC” -> “and the NAC”                                                                                                                                                                               |
| [L318] | “All configurations simulate weaker heat transport” -> “All configurations simulate a weaker heat transport” or “simulate weaker heat transports”                                                                                              |
| [L320] | “surface heat fluxe (d–f)” -> “surface heat flux” (caption Fig. 9)                                                                                                                                                                             |
| [L321] | “shows the the center of deep convection” -> Delete duplicate “the”                                                                                                                                                                            |
| [L326] | “increase in volume transport occurs between the LH and HH configurations,(Fig. 7d)” -> Add space before parenthesis; remove stray comma                                                                                                       |
| [L338] | “relatively low numbers (<100 w/m2)” -> “W/m2” (capital W); inconsistent with W/m2 elsewhere                                                                                                                                                   |
| [L344] | “yields not only higher SST but also a wider distribution” -> Parallelism: “not only a higher SST but also a wider distribution” or “not only higher SST but also wider distribution”                                                          |
| [L347] | “sufficient to produce larger and thus a wider range of surface heat fluxes” -> “larger and thus a wider range” is garbled; e.g. “larger and thus a wider range of surface heat fluxes” -> “larger surface heat fluxes and thus a wider range” |
| [L362] | “keeps the atmosphere cold in HH–LH” -> Clarify difference notation; “in HH relative to LH (HH–LH)”                                                                                                                                            |
| [L383] | “both surface conditions, e.g. SST and THF” -> “e.g.,” with comma; consider “such as SST and THF”                                                                                                                                              |

| Line   | Correction                                                                                                                                                                                                                             |
|--------|----------------------------------------------------------------------------------------------------------------------------------------------------------------------------------------------------------------------------------------|
| [L388] | “The three model configuration with varying” -> “The three model configurations”                                                                                                                                                       |
| [L392] | “the mean state of North Atlantic Ocean” -> “the North Atlantic Ocean”                                                                                                                                                                 |
| [L404] | “colder and fresher water masses at mid-depths ( $\approx$ 500–1500 m) from 0–50°N in LH and HH is observed” -> “are observed” (plural “water masses”)                                                                                 |
| [L407] | “a more realistic overflow of dense water similarly to the high-latitude overflows” -> “similar to the high-latitude overflows”                                                                                                        |
| [L408] | “in Colombo et al. (2020)” -> “as in Colombo et al. (2020)” or “reported by Colombo et al. (2020)”                                                                                                                                     |
| [L418] | “(Grist et al., 2018; Roberts et al., 2020, 2019; Hirschi et al., 2020), not found but disagrees” -> Stray “not found” appears erroneous; delete                                                                                       |
| [L420] | “The stronger AMOC in the LH and HH configuration” -> “configurations”                                                                                                                                                                 |
| [L437] | “The intense warm boundary currents (Fig. 8) leads to higher SST” -> “currents ... lead to” (plural subject)                                                                                                                           |
| [L445] | “our study specifically highlight the differences” -> “our study specifically highlights”                                                                                                                                              |
| [L447] | “the differences in oceanic meridional heat transport between the simulations is also reflected” -> “differences ... are also reflected”                                                                                               |
| [L448] | “leads to increase in mid-high-latitude SST” -> “leads to an increase”                                                                                                                                                                 |
| [L449] | “in the LH and HH configuration” -> “configurations”                                                                                                                                                                                   |
| [L453] | “The nested ocean model in LH and HH, simulates a deeper mixed layer” -> Remove comma before “simulates”                                                                                                                               |
| [L455] | “A multi-model intercomparison by (Koenigk et al., 2021) reported” -> “by Koenigk et al. (2021)” (citation form)                                                                                                                       |
| [L462] | “The warmer SPNA in the LH and HH configurations than in the LL configuration lead to stronger heat loss and increases deep convection” -> “leads to stronger heat loss and increases” (singular subject SPNA) or make both consistent |
| [L478] | “consistent with findings by (Outten et al., 2018)” -> “by Outten et al. (2018)” (citation form)                                                                                                                                       |
| [L483] | “heat transport to the Nordic Seas decreases with increase in atmospheric model resolution” -> “with an increase in atmospheric model resolution”                                                                                      |
| [L488] | “could potentially feedback the strength of the AMOC” -> “feed back on the strength” (verb form / preposition)                                                                                                                         |
| [L489] | “particularly deep convection and the overflow transports will enhance” -> Comma before “will”: “...and the overflow transports, will enhance”                                                                                         |
| [L492] | “which implies, the mean AMOC state plays” -> “which implies that the mean AMOC state plays” (remove comma, add “that”)                                                                                                                |
| [L504] | “OpenIFS’s licence is easily given free of charge” -> “is provided free of charge” (“easily given” awkward)                                                                                                                            |
| [L511] | “(Valcke et al., 2021).The observation” -> Missing space after period: “2021). The observation”                                                                                                                                        |
